# Supplementary material for: Module-Based Analysis of Robustness Tradeoffs in the Heat Shock Response System
Source: PubMed Central journal article supplement (PMC1523291; doi:10.1371/journal.pcbi.0020059), 2006-07-28
Supplement: pcbi.0020059.sg003.pdf [file pcbi.0020059.sg003.pdf]

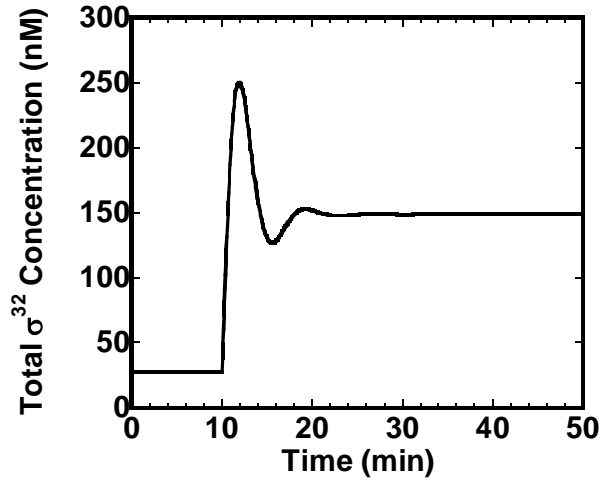

**Figure S3.** Time evolution of  $\sigma^{32}(S_t)$  for a reduced qualitative model of the heat shock response (**Table S1**). Heat shock occurs at 10 min with an altered rate constant for denaturing proteins and translation for  $\sigma^{32}$ .  $K(T)$  is changed from  $20 \text{ min}^{-1}$  at low temperature to  $60 \text{ min}^{-1}$  at high temperature, while  $\eta(T)$  is changed from  $7.5 \times 10^{-8} \text{ M min}^{-1}$  at low temperature to  $4 \times 75.0$  at high temperature. The other parameters are  $\alpha_d = 0.09 \text{ min}^{-1}$ ,  $\alpha_0 = 0.09 \text{ min}^{-1}$ ,  $K_{fold} = 5000 \text{ min}^{-1}$ ,  $K_u = 1.0 \times 10^{10} \text{ M}^{-1}$ ,  $P_t = 1.0 \times 10^{-5} \text{ M}$ ,  $K_s = 1.0 \times 10^{10} \text{ M}^{-1}$ ,  $K_d = 0.75 \text{ min}^{-1}$ ,  $\alpha_s = 1.2 \text{ min}^{-1}$ . The reduced order heat shock equations successfully reproduce the qualitative dynamic behavior of the heat shock response.
