# Supplementary material for: Module-Based Analysis of Robustness Tradeoffs in the Heat Shock Response System
Source: PLOS journal article supplement (doi:10.1371/journal.pcbi.0020059), 2006-07-24

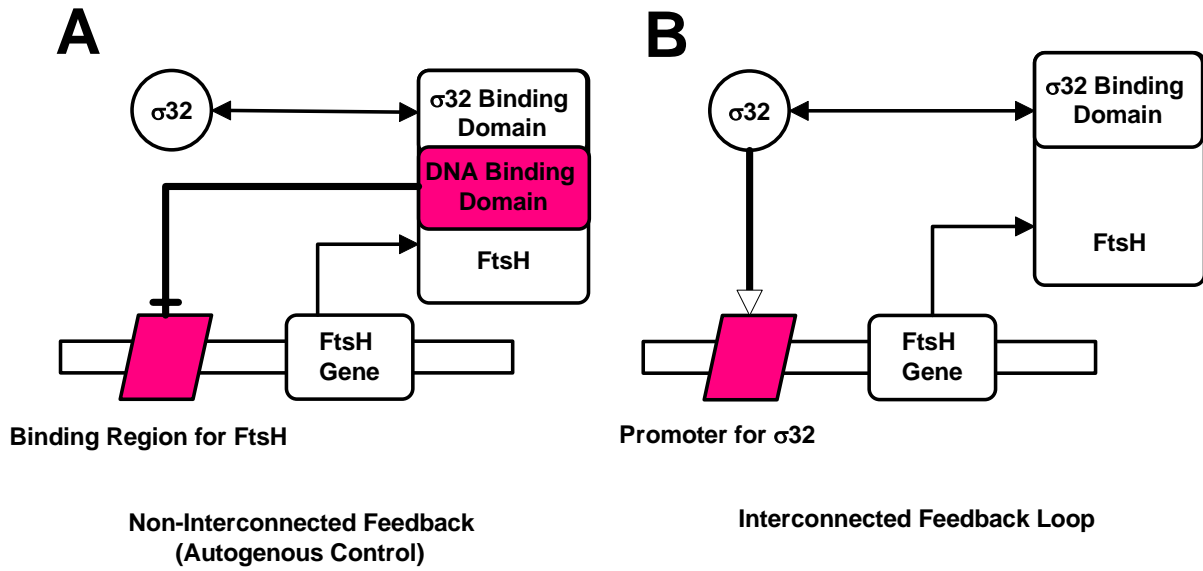

**Figure S5.** Protocol for interconnected feedback loops. Evolution of the DEG-FB loop is used as an example. For robust operation, a heat shock system lacking regulated degradation of  $\sigma^{32}$  by a member of its own regulon could evolve an independent controller that stabilizes the levels of FtsH tightly around its desired value (**A**). A more straightforward solution to the problem is to employ the protocol of an interconnected loop whereby the FtsH module is evolved just by fusing a promoter for binding of  $\sigma^{32}$  to the FtsH gene (**B**). In both cases, the red symbols must be added for a robust modular system.

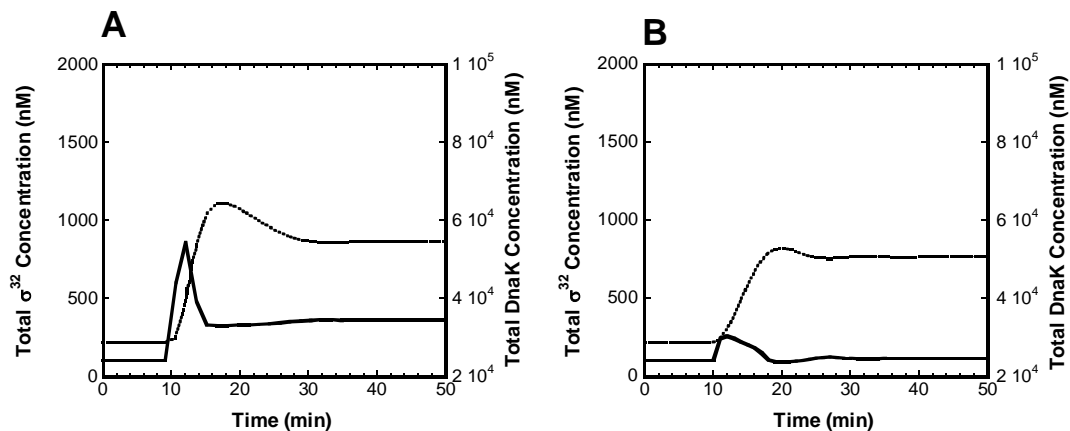

Supplement: S5 (10.1371/journal.pcbi.0020059.s005) [file journal.pcbi.0020059.s005]
